# Supplementary material
Source: Springer Nature journal article supplement (https://www.springermedizin.de/resource/supplementary/12961_2004_13_MOESM2_ESM.pdf/9571216)
Supplement: MOESM2 [file 9571216]

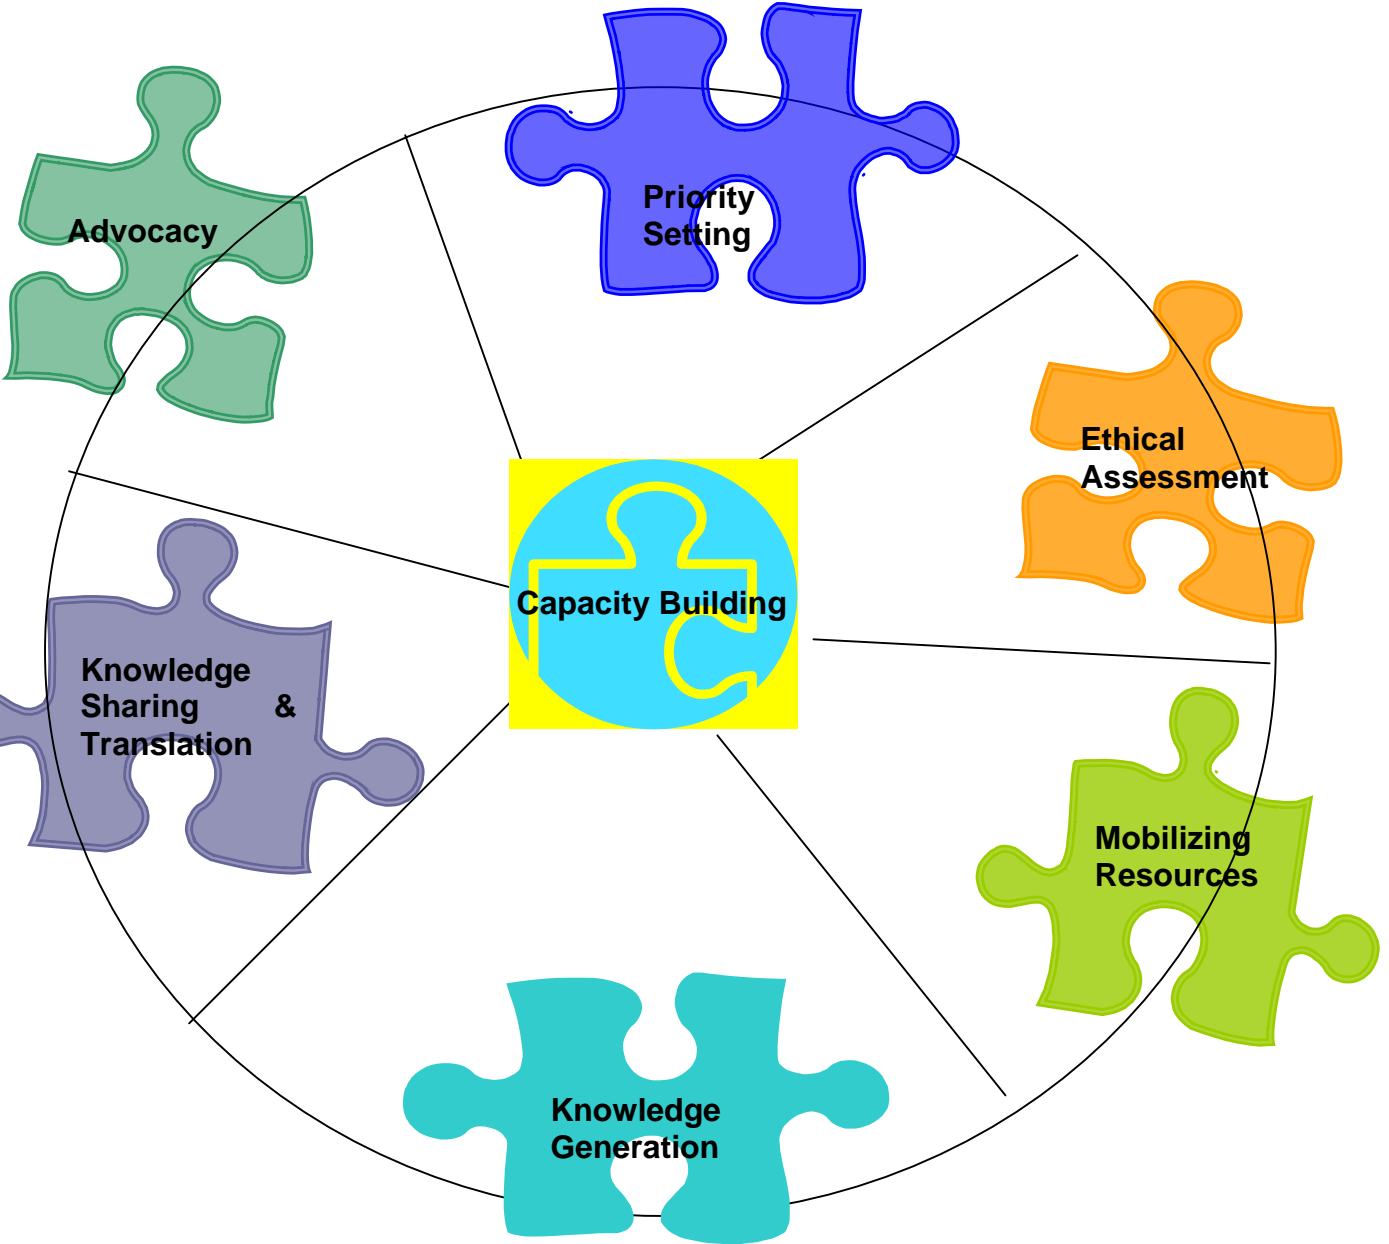

**Priority  
Setting**

**Ethical  
Assessment**

**Capacity Building**

**Advocacy**

**Knowledge  
Sharing  
&  
Translation**

**Mobilizing  
Resources**

**Knowledge  
Generation**
